# Supplementary material for: Evidence of Unhealthy Dietary Patterns in the School Lunch Sent from Home for Children in Mexico City
Source: MDPI journal article supplement (doi:10.3390/ijerph191811650), 2022-09-15
Supplement: s1 [file s1]

**Table S1.** Groups of foods

| Group code | % Energy in school lunch | Food groups                                             | Foods                                                                                                                                                                |
|------------|--------------------------|---------------------------------------------------------|----------------------------------------------------------------------------------------------------------------------------------------------------------------------|
| 1          | 1.7                      | Vegetables                                              | Carrots, tomatoes, lettuce, cucumbers, and Mexican yams                                                                                                              |
| 2          | 7.2                      | Fruits                                                  | Bananas, apples, pears, kiwis, guavas, grapes, peaches, figs, tangerines, oranges, pineapples, and watermelons                                                       |
| 3          | 8.9                      | Cereals                                                 | Rice, spaghetti, pasta soup, breadcrumbs, flour, crackers, and bread                                                                                                 |
| 4          | 0.1                      | Tubers                                                  | Home-made potatoes                                                                                                                                                   |
| 5          | 1.1                      | Ready-to eat cereal boxes (low in fiber, high in sugar) | Corn flakes, puffed rice, and Froot loops                                                                                                                            |
| 6          | 8.7                      | Sweet cookies and cereals                               | Sweet cookies, coated or stuffed, sweetened cereal bars, rice with milk, <i>churros</i> , hot cakes, waffles, and cake.                                              |
| 7          | 21.6                     | Sandwiches and <i>tortas</i> made from ham and sausages | Sandwiches and <i>tortas</i> whose main ingredients are ham and sausages                                                                                             |
| 8          | 1.6                      | Mexican dishes based on corn with fat                   | <i>Quesadillas</i> , <i>tlacoyos</i> (thick <i>tortilla</i> filled with beans or other ingredients), <i>tamales</i> , and <i>tacos dorados</i> (golden crispy tacos) |
| 9          | 6.8                      | Cold meat                                               | Ham, <i>chorizo</i> , sausages, bacon, and nuggets (not included in the sandwich or <i>torta</i> ).                                                                  |
| 10         | 0.3                      | Fast food                                               | Pizza, Kentucky Fried Chicken®.                                                                                                                                      |
| 11         | 0.2                      | Fish                                                    | Tuna, fish fillet                                                                                                                                                    |
| 12         | 0.5                      | Eggs                                                    | Whole eggs                                                                                                                                                           |
| 13         | 1.0                      | Lean meat                                               | Chicken breasts, beef, and pork                                                                                                                                      |
| 14         | 0.2                      | Legumes                                                 | Beans                                                                                                                                                                |
| 15         | 1.7                      | Cheese low in fat                                       | Fresh cheese                                                                                                                                                         |
| 16         | 3.5                      | Cheese high in fat                                      | Manchego cheese (made from sheep's milk), American cheese, cream cheese, and goat cheese                                                                             |
| 17         | 0.8                      | Milk and plain yogurt                                   | Non-flavored, sugar-free milk, and plain yogurt                                                                                                                      |
| 18         | 11.2                     | Sweetened dairy products                                | Flavored milk and yogurt, sweetened and fermented dairy products                                                                                                     |
| 19         | 5.5                      | Oils and fats                                           | Oil, avocado, butter, mayonnaise, and cream                                                                                                                          |
| 20         | 0.8                      | Seeds                                                   | Nuts, almonds, plain peanuts, pumpkin seeds, and sesame seeds                                                                                                        |
| 21         | 10.7                     | Sugary beverages                                        | Fresh water with sugar, processed sugary water, carbonated soft drinks, processed juice, and sports drinks                                                           |
| 22         | 4.2                      | Confectionery                                           | Table sugar, honey, chocolate bars, jam, jelly fruit candy, candy, flavored jelly, crème caramel, fruit in syrup, condensed milk, hazelnut cream, and peanut butter  |
| 23         | 1.0                      | Fried products and snacks                               | Chips, popcorn, fried products based on corn or flour                                                                                                                |
| 24         | 0.5                      | Sauces and condiments                                   | Ketchup, <i>chipotle</i> , chile powder, salt, spicy sauce, and soy sauce                                                                                            |

**Table S2.** Children's dietary patterns from the school lunch

| Sandwiches, <i>tortas</i> , and sweetened dairy products<br><i>n</i> = 46 (13.1%) |               | Sweet snack<br><i>n</i> = 176 (50.3%)     |               | Sweetened dairy products<br><i>n</i> = 53 (15.1%) |               | Sandwiches and <i>tortas</i><br><i>n</i> = 75 (21.4%) |               |
|-----------------------------------------------------------------------------------|---------------|-------------------------------------------|---------------|---------------------------------------------------|---------------|-------------------------------------------------------|---------------|
| Food group                                                                        | %<br>Calories | Food group                                | %<br>Calories | Food group                                        | %<br>Calories | Food group                                            | %<br>Calories |
| Sandwiches and <i>tortas</i>                                                      | 46.3          | Cereals (without added sugar)             | 14.4          | Sweetened dairy products                          | 46.8          | Sandwiches and <i>tortas</i>                          | 72.0          |
| Sweetened dairy products                                                          | 23.1          | Sugary beverages                          | 13.3          | Cereals (without added sugar)                     | 9.9           | Sugary beverages                                      | 8.7           |
| Sweet cereals and cookies                                                         | 7.6           | Sweet cereals and cookies                 | 13.1          | Sugary beverages                                  | 8.0           | Cheese high in fat                                    | 4.5           |
| Sugary beverages                                                                  | 6.8           | Cold meat                                 | 12.0          | Fruits                                            | 6.7           | Cheese low in fat                                     | 3.1           |
| Cheese low in fat                                                                 | 3.3           | Fruits                                    | 10.5          | Sweet cereals and cookies                         | 5.6           | Fruits                                                | 2.7           |
| Fried products and snacks                                                         | 2.7           | Oils and fats                             | 8.0           | Oils and fats                                     | 5.3           | Oils and fats                                         | 2.5           |
| Confectionery                                                                     | 2.3           | Confectionery                             | 5.4           | Cold meat                                         | 5.0           | Confectionery                                         | 2.3           |
| Fruits                                                                            | 1.8           | Cheese high in fat                        | 4.1           | Confectionery                                     | 4.3           | Sweet cereals and cookies                             | 1.3           |
| Cheese high in fat                                                                | 1.5           | Mexican dishes based on corn with fat     | 3.2           | Ready-to eat cereal boxes (high in sugar)         | 1.4           | Sweetened dairy products                              | 1.1           |
| Oils and fats                                                                     | 1.3           | Vegetables                                | 2.8           | Cheese high in fat                                | 1.3           | Fast food                                             | 0.4           |
| Cereals (without added sugar)                                                     | 0.9           | Sweetened dairy products                  | 1.7           | Lean meat                                         | 1.0           | Vegetables                                            | 0.3           |
| Ready-to eat cereal boxes (high in sugar)                                         | 0.7           | Lean meat                                 | 1.6           | Vegetables                                        | 0.8           | Lean meat                                             | 0.3           |
| Seeds                                                                             | 0.4           | Ready-to eat cereal boxes (high in sugar) | 1.4           | Seeds                                             | 0.7           | Ready-to eat cereal boxes (high in sugar)             | 0.2           |
| Vegetables                                                                        | 0.3           | Milk and plain yogurt                     | 1.3           | Milk and plain yogurt                             | 0.6           | Eggs                                                  | 0.1           |
| Milk and plain yogurt                                                             | 0.3           | Seeds                                     | 1.3           | Fried products and snacks                         | 0.5           | Legumes                                               | 0.1           |
|                                                                                   |               | Fried products and snacks                 | 1.1           | Eggs                                              | 0.5           |                                                       |               |
|                                                                                   |               | Cheese low in fat                         | 1.0           | Fish                                              | 0.3           |                                                       |               |
|                                                                                   |               | Sauces and condiments                     | 0.8           | Sauces and condiments                             | 0.3           |                                                       |               |

|           |     |         |     |
|-----------|-----|---------|-----|
| Eggs      | 0.8 | Legumes | 0.2 |
| Fish      | 0.4 | Tubers  | 0.1 |
| Fast food | 0.4 |         |     |
| Legumes   | 0.3 |         |     |
| Tubers    | 0.2 |         |     |
